# Supplementary material for: Regulatory T Cells Prevent Th2 Immune Responses and Pulmonary Eosinophilia during Respiratory Syncytial Virus Infection in Mice
Source: PubMed Central journal article supplement (PMC3807299; doi:10.1128/jvi.01295-13), 2013-10
Supplement: JVI.01295-13_zjv999098159so1.pdf [file JVI.01295-13_zjv999098159so1.pdf]

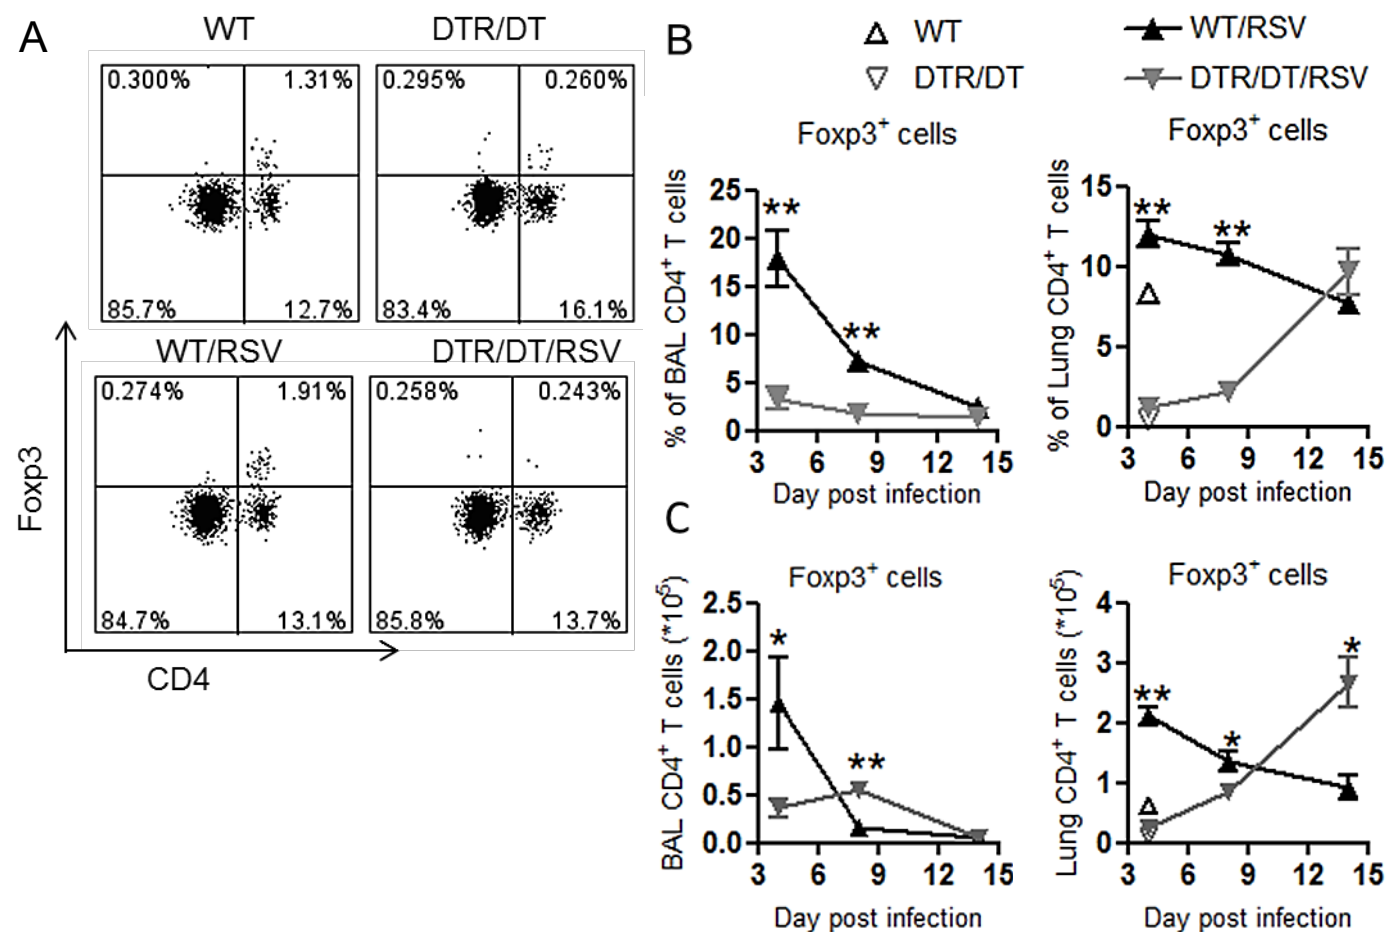

**Fig. S1. Regulatory T cells can be acutely depleted in *Foxp3<sup>DTR</sup>* mice using two consecutive diphtheria toxin treatments.** Wild type (WT/RSV) or Treg-depleted (DTR/DT/RSV) mice were infected with RSV and diphtheria toxin was administered to *Foxp3<sup>DTR</sup>* mice twice intraperitoneally to deplete Treg cells. Uninfected wild type (WT) or Treg-depleted (DTR/DT) mice were included as controls. A) Representative FACS plots show the percentage of *Foxp3<sup>+</sup>* *CD4<sup>+</sup>* T cells in the lungs of WT or DTR mice on day 4 post-infection. B) The frequency and C) the total numbers of *Foxp3<sup>+</sup>* Treg cells in the airways (BAL) and lungs on Days 4, 8 and 14 post-infection. Data are representative of three independent experiments. \*  $p \leq 0.05$ , \*\*  $p \leq 0.01$ .

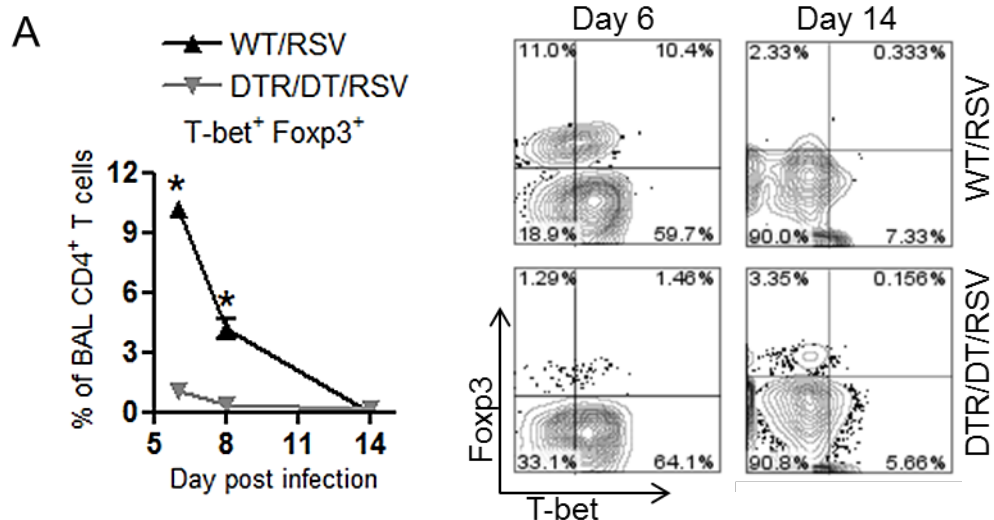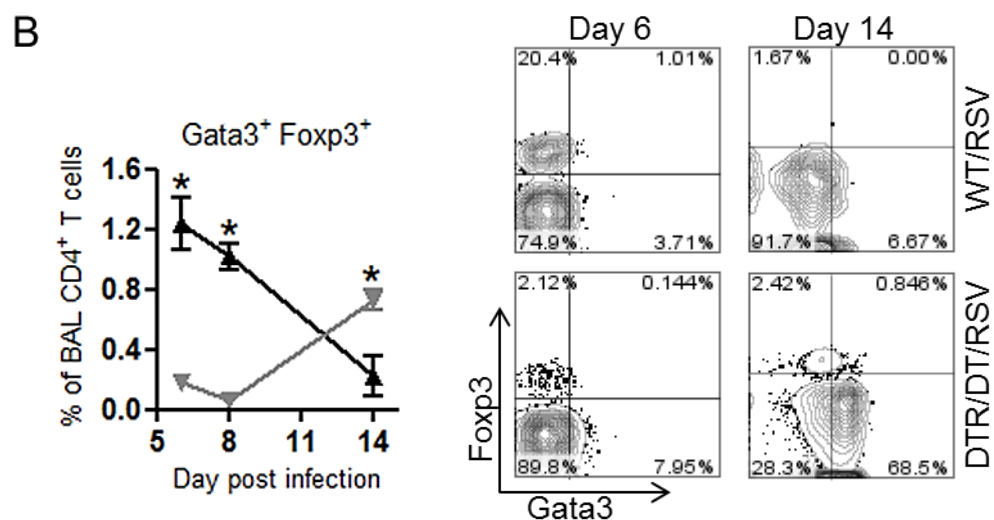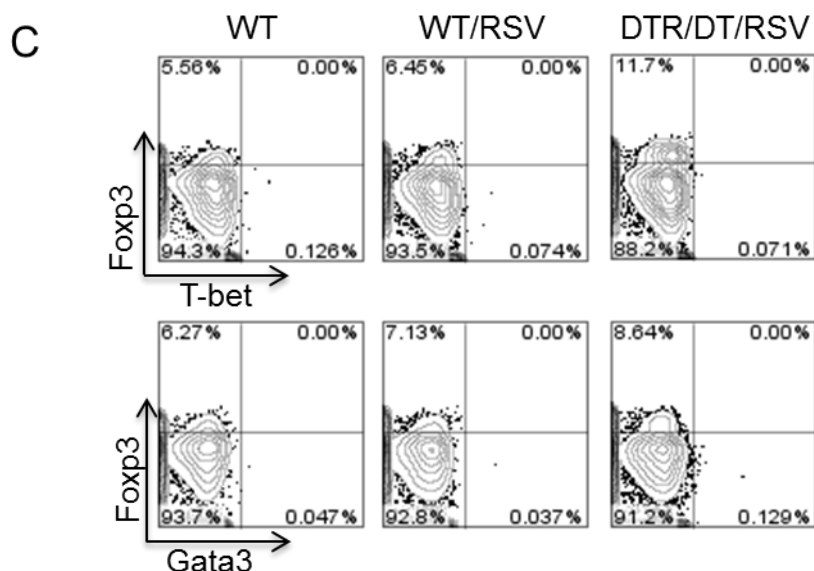

**Fig. S2. Expansion of Th2-type regulatory T cells in the inflamed airways of Treg-depleted mice following RSV infection.** Wild type (WT/RSV) or Treg-depleted (DTR/DT/RSV) mice were infected with RSV and CD4<sup>+</sup> T cells were examined in the tissues using flow cytometry. The frequency of Foxp3<sup>+</sup> Treg cells expressing the transcription factors A) T-bet and B) Gata3 are shown for day 6, 8 and 14 along with representative FACS plots of CD4<sup>+</sup> T cells in the BAL on day 6 and 14 post infection. C) Representative FACS plots showing expression of Foxp3, T-bet and Gata3 on CD4<sup>+</sup> T cells in the lung on day 14 post infection. Data are representative of two independent experiments (n=3-4 mice per group). \* p<0.05, \*\* p<0.01.
